# Supplementary material for: IL-1β is not critical to chronic heart dysfunction in mice with Chagas disease
Source: PubMed Central journal article supplement (PMC9627615; doi:10.3389/fimmu.2022.1010257), 2022-10-14

| Arrhythmias                   | WT<br>(n = 14) |     | WT + Tc<br>(n = 22) |      | IL-1R<br>(n = 9) |      | IL-1R + Tc<br>(n = 10) |      | Tc + AK<br>(n = 12) |      |
|-------------------------------|----------------|-----|---------------------|------|------------------|------|------------------------|------|---------------------|------|
|                               | N              | %   | N                   | %    | N                | %    | N                      | %    | N                   | %    |
| <b>Atrioventricular block</b> | 0              | 0.0 | 14                  | 63.6 | 0                | 0.0  | 7                      | 70.0 | 9                   | 75.0 |
| First degree                  | 0              | 0.0 | 7                   | 31.8 | 0                | 0.0  | 2                      | 20.0 | 5                   | 41.7 |
| Second degree                 | 0              | 0.0 | 3                   | 13.6 | 0                | 0.0  | 3                      | 30.0 | 0                   | 0.0  |
| Third degree                  | 0              | 0.0 | 4                   | 18.2 | 0                | 0.0  | 2                      | 20.0 | 4                   | 33.3 |
| <b>Tachyarrhythmias</b>       | 1              | 7.1 | 12                  | 54.5 | 1                | 11.1 | 6                      | 60.0 | 2                   | 16.6 |
| Supraventricular extrasystole | 0              | 0.0 | 3                   | 13.6 | 1                | 11.1 | 1                      | 10.0 | 0                   | 0.0  |
| Ventricular extrasystole      | 1              | 7.1 | 2                   | 9.1  | 0                | 0.0  | 2                      | 20.0 | 0                   | 0.0  |
| Couplet                       | 0              | 0.0 | 3                   | 13.6 | 0                | 0.0  | 0                      | 0.0  | 1                   | 8.3  |
| Triplet                       | 0              | 0.0 | 2                   | 9.1  | 0                | 0.0  | 3                      | 30.0 | 1                   | 8.3  |
| Bigeminy                      | 0              | 0.0 | 2                   | 9.1  | 0                | 0.0  | 0                      | 0.0  | 0                   | 0.0  |
| Supraventricular tachycardia  | 0              | 0.0 | 0                   | 0.0  | 0                | 0.0  | 1                      | 10.0 | 1                   | 8.3  |
| Junctional Rythm              | 0              | 0.0 | 0                   | 0.0  | 0                | 0.0  | 1                      | 10.0 | 0                   | 0.0  |
| Atrial Fibrillation           | 0              | 0.0 | 0                   | 0.0  | 0                | 0.0  | 1                      | 10.0 | 0                   | 0.0  |
| Ventricular tachycardia       | 0              | 0.0 | 3                   | 13.6 | 0                | 0.0  | 1                      | 10.0 | 1                   | 8.3  |
| <b>Total</b>                  | 1              | 7.1 | 19                  | 86.4 | 1                | 11.1 | 8                      | 80.0 | 10                  | 83.3 |

A.

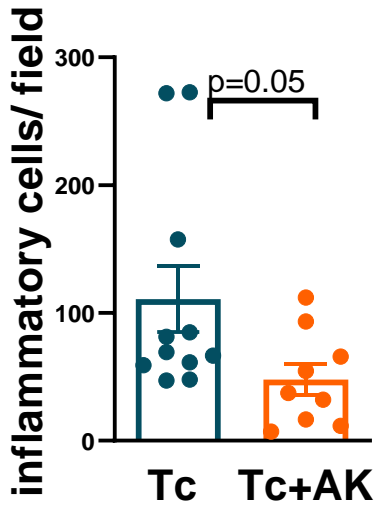

B.

Tc

Tc+AK

H&E

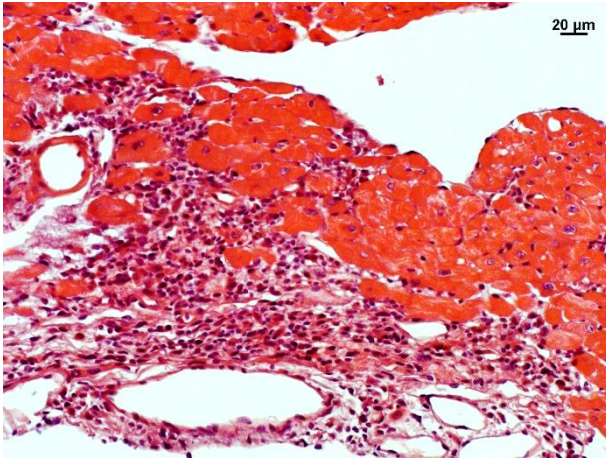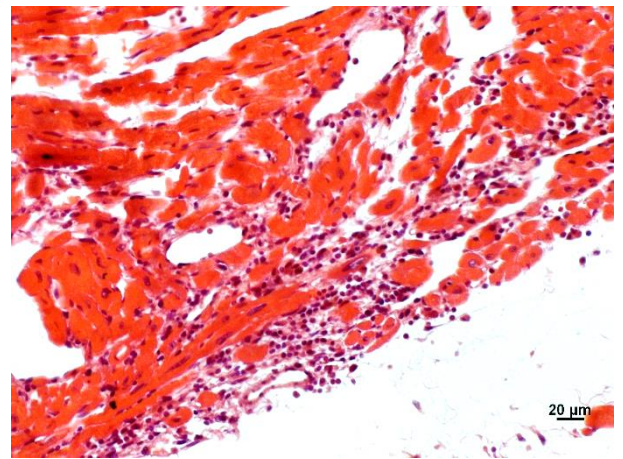

Masson

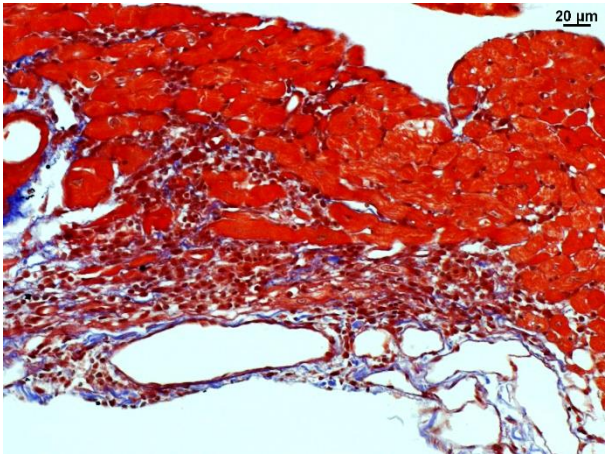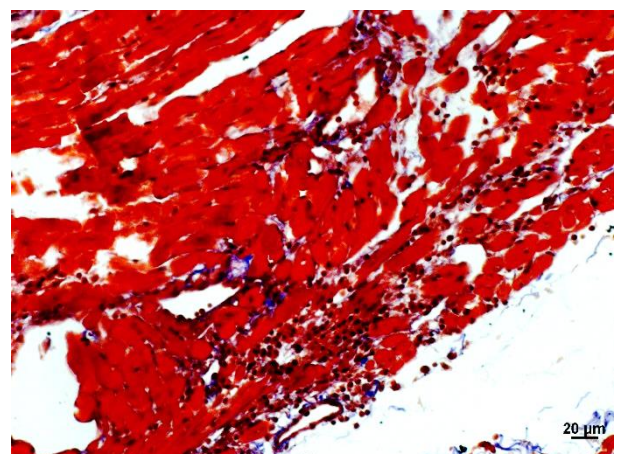

Supplement: DataSheet_1.pdf [file DataSheet_1.pdf]
